# Supplementary material
Source: Springer Nature journal article supplement (https://www.springermedizin.de/resource/supplementary/12891_2008_541_MOESM4_ESM.pdf/9511268)

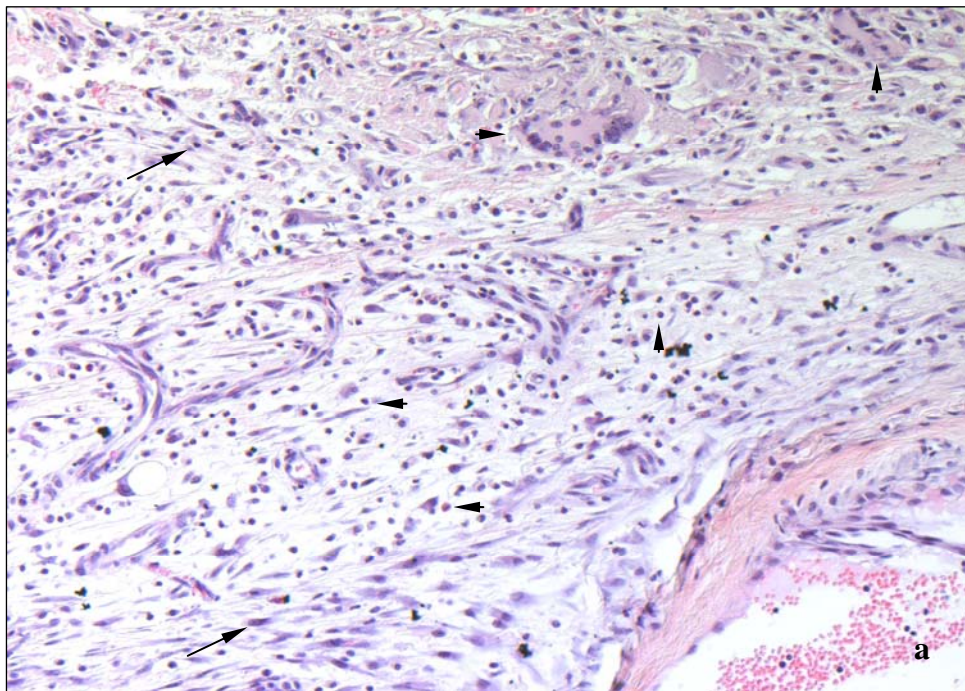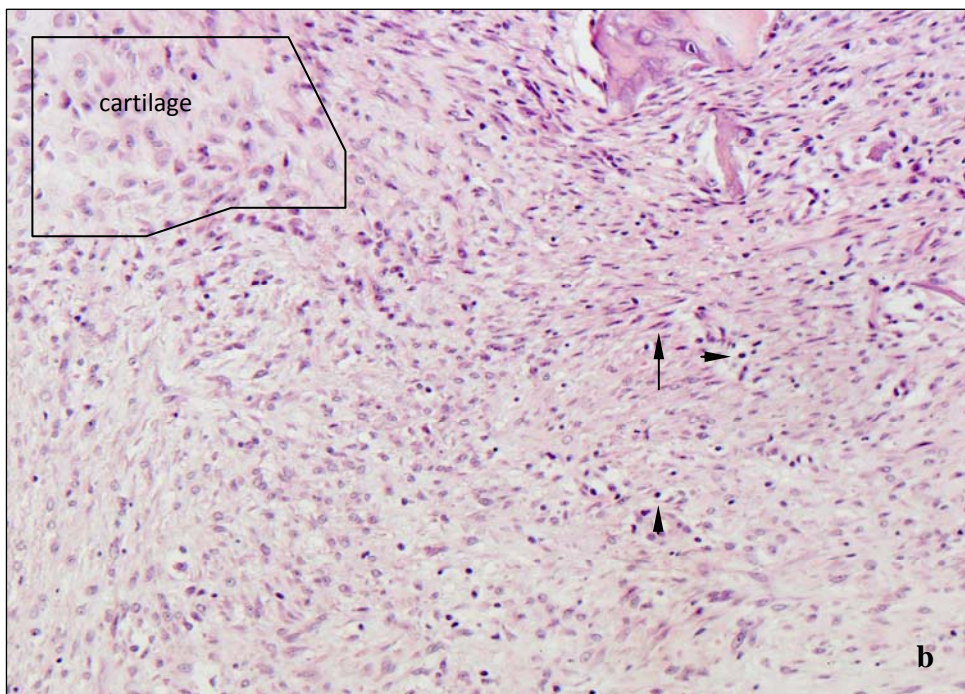

Supplement: MOESM4 [file 9511268]
